# Supplementary material for: Peptide presentation by HLA-DQ molecules is associated with the development of immune tolerance
Source: PeerJ. 2018 Jul 3;6:e5118. doi: 10.7717/peerj.5118 (PMC6034589; doi:10.7717/peerj.5118)
Supplement: Table S2 [file peerj-06-5118-s002.xlsx]

## Sheet: Supplementary_table_2
Species	Mean binding score		P	Pcorr
	DQ	DR
Aspergillus fumigatus	0.8607	0.849642	0.476309	0.555694
Bacillus anthracis	0.868963	0.879293	0.0364147	0.069519
Borrelia burgdorferi	0.937568	0.938738	0.91394	0.91394
Burkholderia pseudomallei	0.941546	0.901991	1.349e-35	1.41645e-34
Clostridium botulinum	0.801299	0.840518	1.17529e-05	4.1135e-05
Clostridium tetani	0.817626	0.84952	4.931e-08	2.58878e-07
Corynebacterium diphtheriae	0.906199	0.887923	0.025393	0.0533252
Francisella tularensis	0.814127	0.871524	2.82655e-10	1.97859e-09
Mycobacterium leprae	0.916505	0.889589	0.00439759	0.0131928
Mycobacterium tuberculosis	0.955052	0.905779	1.15713e-43	2.42998e-42
Streptococcus pyogenes	0.94263	0.933078	0.126262	0.178062
Mean binding score: the mean of binding score values of epitopes associated with the given species; the larger score is marked with bold characters P: Wilcoxon rank sum test P values Pcorr: P values adjusted with the Benjamini-Hochberg procedure, significant values (i. e. smaller than 0.1) are marked with red color
